# Supplementary material for: The Use of Pre-Endoscopic Metoclopramide Does Not Prevent the Need for Repeat Endoscopy: A U.S. Based Retrospective Cohort Study
Source: MDPI journal article supplement (doi:10.3390/life14040526), 2024-04-19
Supplement: s1 [file s1]

Supplementary Materials

Table S1: ICD-10 and CPT Codes Used in Methodology

| • Patient Diagnoses |                                                                                                                                                              |              |
|---------------------|--------------------------------------------------------------------------------------------------------------------------------------------------------------|--------------|
| PUD                 | Chronic or unspecified peptic ulcer, site unspecified, with both hemorrhage and perforation                                                                  | ICD-10 K27.6 |
|                     | Peptic ulcer, site unspecified                                                                                                                               | ICD-10 K27   |
|                     | Acute peptic ulcer, site unspecified, with hemorrhage                                                                                                        | ICD-10 K27.0 |
|                     | Chronic or unspecified peptic ulcer, site unspecified, with hemorrhage                                                                                       | ICD-10 K27.4 |
|                     | Acute peptic ulcer, site unspecified, with perforation                                                                                                       | ICD-10 K27.1 |
|                     | Acute peptic ulcer, site unspecified, with both hemorrhage and perforation                                                                                   | ICD-10 K27.2 |
|                     | Acute peptic ulcer, site unspecified, without hemorrhage or perforation                                                                                      | ICD-10 K27.3 |
|                     | Chronic peptic ulcer, site unspecified, without hemorrhage or perforation                                                                                    | ICD-10 K27.7 |
|                     | Chronic or unspecified peptic ulcer, site unspecified, with perforation                                                                                      | ICD-10 K27.5 |
| UGIB                | Gastrointestinal hemorrhage, unspecified                                                                                                                     | ICD-10 K92.2 |
| EGD                 | Esophagogastroduodenoscopy, flexible, transoral; with injection sclerosis of esophageal/gastric varices                                                      | CPT 43243    |
|                     | Esophagogastroduodenoscopy, flexible, transoral; diagnostic, including collection of specimen(s) by brushing or washing, when performed (separate procedure) | CPT 43235    |
|                     | Esophagogastroduodenoscopy, flexible, transoral; with directed submucosal injection(s), any substance                                                        | CPT 43236    |
|                     | Esophagogastroduodenoscopy, flexible, transoral; with biopsy, single or multiple                                                                             | CPT 43239    |
| • Outcomes          |                                                                                                                                                              |              |
| Transfusion         | Transfusion, blood or blood components                                                                                                                       | CPT 36430    |

ICD-10: International Classification of Diseases 10th Revision; CPT: Current Procedural Terminology; PUD: Peptic Ulcer Disease; UGIB: Upper gastrointestinal bleed; EGD: Esophagogastroduodenoscopy;
